# Supplementary material
Source: PubMed Central journal article supplement (PMC3466552)
Supplement: cc-11-3415-s01.pdf [file cc-11-3415-s01.pdf]

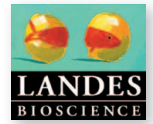

## **Supplemental Material to:**

**Raffaele La Montagna, Isabella Caligiuri, Pasquale Maranta,  
Chiara Lucchetti, Luca Esposito, Marco G. Paggi,  
Giuseppe Toffoli, Flavio Rizzolio and Antonio Giordano**

**Androgen receptor serine 81 mediates Pin1 interaction  
and activity**

**2012; 11(18)**

**<http://dx.doi.org/10.4161/cc.21730>**

**<http://www.landesbioscience.com/journals/cc/article/21730/>**

**Name****Sequence****PIN1**

PIN1-BamHIF GCGGATCCGCGGCAGGAGGGAAGATGG

PIN1-EcoRIR GCGAATTCTGGGCTCCCCACCTCAC

**AR**

ARNTD-BamHIF ATGGATCCAGGATGGAAGTGCAGTTAGGGC

ARDBD-ECORIR ATGAATTCCAGCTTCCGGGCTCCCAG

ARLBD-BamH1F2 ATGGATCCACCATGCTGAAGAACTTGGTAATCTG

ARLBD-XHOIR2 ATCTCGAGCACTGGGTGTGGAAATAGATG

ARNTD-BamHIF ATGGATCCAGGATGGAAGTGCAGTTAGGGC

ARNTDA-R ATGAATTCCTTACACAACCTCCTTGGCGTTG

ARNTDB-F ATTGGATCCACCATGGCAGTGTGGTGTCCATG

ARNTDB-R ATTGAATTCCGCCAGGTCCCCATAGCGG

ARNTDC-F ATTGGATCCACCATGAGCCTGCATGGCGCGGGTG

ARNTD-ECORIR ATGAATTCGGTCTGGGGTGGAAAGTACC

ARS81A-f GCAGCAAGAGACT**GCCCC**CAGGCAGCAG

ARS81A-r CTGCTGCCTGGGGCAGTCTCTTGCTGC5

ARS94A-f GTGAGGATGGT**GCT**CCCCAAGCCCATCG

ARS94A-r CGATGGGCTTGGGGAGCACCATCCTCAC
